# Supplementary material for: A Nonlinear Model for Gene-Based Gene-Environment Interaction
Source: Int J Mol Sci. 2016 Jun 4;17(6):882. doi: 10.3390/ijms17060882 (PMC4926416; doi:10.3390/ijms17060882)
Supplement: Supplementary file 1 [file ijms-17-00882-s001.xlsx]

## Sheet: Sheet1
NCOA5						ANGPT1
SNP_Name	sPC1	sPC2	sPC3	sPC4		SNP_Name	sPC1	sPC2	sPC3	sPC4	sPC5	sPC6	sPC7
	0.0044	0.0708	0.0344	0.002			0.08	0.0812	0.3771	0.0042	0.0337	0.0118	0.0029	p-value for testing the overall genetic effect
	0.0017	0.486	0.0172	0.0021			0.6711	0.0416	0.2446	0.0088	0.2282	0.4256	0.0195	p-value for testing the G×E interaction effect
rs742594	0	0.549262	0	0		rs2022962	0	-0.277187	0	0	0	0	0
rs2425882	0	-0.3511	0	0		rs12547442	0	-0.169012	0	0	0	0	0
rs2425884	0	-0.396968	0	0		rs2022958	0	0	0	-0.0690859	0	0	-0.467803
rs3091520	0	0.52683	0	0		rs1954741	0	0.172882	0	0	0	0	0
rs2425886	0	0.374041	0	0		rs2584382	0	-0.275716	0	0	0	0	0
rs941206	0.364984	0	0	0		rs7833208	0	-0.146945	0	0	0	0	0
rs2425887	0.324365	0	0	0		rs2844270	0	0	0	-0.469697	0	0	0
rs3091556	0.393767	0	0	0		rs4305876	0	-0.293934	0	0	0	0	0
rs6122514	0	0	-0.89578	0		rs7012260	0	0	0	-0.294185	0	0	0
rs2745726	0	0	-0.444497	0		rs9643029	0	0	0	0	0	0	-0.566202
rs6017947	0.466118	0	0	0		rs7464479	0	0	0	0	0	0	-0.678657
rs6017949	0.58431	0	0	0		rs10099794	0	0	0	-0.490365	0	0	0
rs6090536	0	0	0	0.759942		rs10094991	0	0.197265	0	0	0	0	0
rs2757524	0.139265	0	0	0.483987		rs1954732	0	0	0	-0.189135	0	0	0
rs1004571	0.168649	0	0	0.433872		rs16875907	0	0	0	0	0	0	0
						rs6469101	0	-0.30511	0	0	0	0	0
						rs1892765	0	0.273976	0	0	0	0	0
						rs2507800	0	0.215722	0	0	0	0	0
						rs1954727	0	0.234539	0	0	0	0	0
						rs2507802	0	0	0	-0.174507	0	0	0
						rs2514874	-0.010172	0	0	-0.615597	0	0	0
						rs2514878	0	0.251155	0	0	0	0	0
						rs11777978	0	0.222185	0	0	0	0	0
						rs10505101	0	-0.327096	0	0	0	0	0
						rs9297393	0.0623394	0.11087	0	0	0	0	0
						rs10090742	-0.0937265	0	0	-0.0492501	0	0	0
						rs13257393	-0.0859307	0	0	0	0	0	0
						rs17295051	0	0	0	0	0	0	0
						rs4595097	-0.405277	0	0	0	0	0	0
						rs4324901	0	0.270018	0	0	0.0380015	0	0
						rs6469108	0	0	0	0	0	0.029441	0
						rs10505105	0	-0.0974878	0	0	0	0	0
						rs4133395	0	-0.172319	0	0	-0.239819	0	0
						rs4472483	0	0	0	0	0	0.626938	0
						rs35143736	-0.266968	0	0	0	0	0	0
						rs4626569	0	0	0	0	0	-0.327528	0
						rs4341142	-0.186961	0	0	0	0	0	0
						rs13273632	-0.164369	0	0	0	0	0	0
						rs1902323	0	0	0	0	0	0.393718	0
						rs10101176	-0.236268	0	0	0	0	0	0
						rs2514850	-0.317396	0	0	0	0	0	0
						rs1433195	0	-0.101223	0	0	0	0	0
						rs2436556	-0.159589	0	0	0	0	0	0
						rs2163870	-0.115058	0	0	0	0	0	0
						rs1672149	0.47634	0	0	0	0	0	0
						rs2514857	0.262859	0	0	0	0	0	0
						rs2514858	-0.290819	0	0	0	0	0	0
						rs2445365	-0.257457	0	0	0	0	0	0
						rs1672195	0	0	0	0	0	-0.586338	0
						rs1347183	0.0225968	0	0	0	0	0	0
						rs2514862	0.0924627	0.134198	0	0	0.256057	0	0
						rs1433176	0.176529	0	0	0	0	0	0
						rs2514864	0	0	-0.47396	0	0	0	0
						rs16876199	0	0	0.31404	0	0	0	0
						rs2916083	0	0	0	0	-0.242153	0	0
						rs1283706	-0.00123342	0	-0.452898	0	0	0	0
						rs10955455	0	0	0	0	0	0	0
						rs4268102	0	0	-0.311934	0	0	0	0
						rs11785702	0	0	-0.562253	0	0	0	0
						rs1283687	0	0	0	0	0	0	0
						rs892248	0	0	0	0	-0.520625	0	0
						rs1654751	0	0	0	0	-0.376462	0	0
						rs1283679	0	0	0	0	-0.164514	0	0
						rs13268748	0	0	0.241233	0	0.0114185	0	0
						rs1283673	0	0	0	0	-0.604572	0	0
						rs1283701	0	0	0	0	0	0	0
						rs1283699	0	0	0	0	-0.106598	0	0
